# Supplementary material for: A Role for CF1A 3′ End Processing Complex in Promoter-Associated Transcription
Source: PubMed Central journal article supplement (PMC3744418; doi:10.1371/journal.pgen.1003722), 2013-08-15
Supplement: pgen.1003722.s007.pdf [file pgen.1003722.s007.pdf]

**Table S1: STRAINS**

| <b><u>Strain</u></b> | <b><u>Genotype</u></b>                                                                            | <b><u>Reference</u></b> |
|----------------------|---------------------------------------------------------------------------------------------------|-------------------------|
| By4733               | <i>MATa his3Δ200 trp1Δ63 leu2Δ0 met15Δ0 ura3Δ0</i>                                                |                         |
| Clp1- 769-5          | <i>MATa ura3Δ0 leu2Δ0 his3Δ1lys2Δ0can1Δ::LEU2-MFA1pr::His3 clp1ts::URA3</i>                       | [1]                     |
| SAM53                | <i>BY4733, MATa his3Δ200 trp1Δ63 leu2Δ0 met15Δ0 ura3Δ0 CLP1-Myc (TRP)</i>                         | [2]                     |
| NAH20                | <i>MATa ura3Δ0 leu2Δ0 his3Δ1 lys2Δ0can1Δ::LEU2-MFA1pr::His3 clp1-ts::URA3.SUA7(TFIIB)-Myc-KMX</i> | This study              |
| NAH21                | <i>MATa ura3Δ0 leu2Δ0 his3Δ1 lys2Δ0can1Δ::LEU2-MFA1pr::His3 clp1-ts::URA3 Rna14-Myc-KMX</i>       | This study              |
| NAH22                | <i>MATa ura3Δ0 leu2Δ0 his3Δ1 lys2Δ0can1Δ::LEU2-MFA1pr::His3 clp1-ts::URA3 Pcf11-Myc-KMX</i>       | This study              |
| NAH25                | <i>MATa ura3Δ0 leu2Δ0 his3Δ1 lys2Δ0can1Δ::LEU2-MFA1pr::His3 clp1-ts::URA3 Rna15-Myc-KMX</i>       | This study              |
| NAH26                | <i>MATa ura3Δ0 leu2Δ0 his3Δ1lys2Δ0can1Δ::LEU2-MFA1pr::His3 clp1ts::URA3 Trp1Δ (KMX)</i>           | This study              |
| NAH31                | <i>MATa ura3Δ0 leu2Δ0 his3Δ1 lys2Δ0can1Δ::LEU2-MFA1pr::His3 clp1-ts::URA3 CCL1-TAP (TRP)</i>      | This study              |
| NAH32                | <i>MATa ura3Δ0 leu2Δ0 his3Δ1 lys2Δ0can1Δ::LEU2-MFA1pr::His3 clp1-ts::URA3 TFA2-TAP (TRP)</i>      | This study              |
| NAH33                | <i>MATa ura3Δ0 leu2Δ0 his3Δ1 lys2Δ0can1Δ::LEU2-MFA1pr::His3 clp1-ts::URA3 TFG2-TAP (TRP)</i>      | This study              |

**REFERENCES**

1. Ben-Aroya et al., (2008) Toward a comprehensive temperature-sensitive mutant repository of the essential genes of *Saccharomyces cerevisiae*. *Mol Cell* 25;30(2):248-58.
2. Medler et al., (2011) Evidence for a Complex of Transcription Factor IIB (TFIIB) with Poly(A) Polymerase and Cleavage Factor 1 Subunits Required for Gene Looping. *JBC* 286 ; 39 : 33709-33718
