# Supplementary material for: A Role for CF1A 3′ End Processing Complex in Promoter-Associated Transcription
Source: PubMed Central journal article supplement (PMC3744418; doi:10.1371/journal.pgen.1003722), 2013-08-15
Supplement: pgen.1003722.s008.pdf [file pgen.1003722.s008.pdf]

## Table S2: PRIMERS

### CHA1 TRO-PRIMERS

| <u>Name</u> | <u>Sequence</u>                                      |
|-------------|------------------------------------------------------|
| CHA1 A      | GATAGCCTCTTGCGACCTTATT<br>CTTAACAGGAGCCGCCAT         |
| CHA1 B      | GCCCCAGCGGAAATGTAA<br>CATTCATATTTCAAGAAAAATTGTG      |
| CHA1 C      | GCGATGAGATAAGATAAAAGGGA<br>GATTACCGATTCTCTACTTTTGA   |
| CHA1 D      | AATTCAAAGGACGGTAAAAGAT<br>AAGGGATGAACATAAATGGGC      |
| CHA1 E      | GTTGGTGGAGGTGGTTTATACA<br>TCTGGTGTGTATTTGCGAGC       |
| CHA1 F      | GGTGGAAACGAATGGATGTC<br>TCTTAGTGTTGTAACCCAAATGC      |
| CHA1 G      | GGAAGAAGCGTTGGATAGCAT<br>CGTTTTGGATATGTTGATGCTTAC    |
| CHA1 H      | GCACAGAATTTGTATAAAGGGG<br>GCTTTTCTTCACTTAGTAAGGATTAA |
| CHA1 I      | GTTCCGTAATAATCTTCCCAGC<br>CTGGGGTCTTCATTTGTGTCA      |

### INO1 RNAP II-ChIP

| <u>Name</u> | <u>Sequence</u>                                           |
|-------------|-----------------------------------------------------------|
| INO1 A      | GAAATATGCGGAGGCCAAG<br>GGAGGTGATTGGAGCAATATTATC           |
| NO1 B       | GCTTGTTCTGTTGTCGGGTTT<br>TCTTCGTAACACTACAGCATTTTTCG       |
| NO1 C       | GTATTAACCGGTCTCCATTGC<br>CCGACGGGCTTCATATATTTG            |
| NO1 D       | GATATCCAGAATTTCAAAGAAGAAAAC<br>TATTCTGCGGTGAACCATTAATATAG |
| NO1 E       | CTCATTTCAACGACTCTCTTTTTTC<br>ATGTTAAGTATATGTATTGATGGAAGG  |
| NO1 F       | GGTAGATGCGAGAAAGTGCTG<br>CTTCTTTCTCGTCCTCCTCCT            |
| CHA1 A      | GCCCCAGCGGAAATGTAA<br>GATTACCGATTCTCTACTTTTGA             |
| CHA1 B      | AATTCAAAGGACGGTAAAAGAT<br>AAGGGATGAACATAAATGGGC           |
| CHA1 C      | GGTGGAAACGAATGGATGTC<br>TCTTAGTGTTGTAACCCAAATGC           |
| CHA1 D      | GGAAGAAGCGTTGGATAGCAT<br>CCCCTTTATACAAATTCTGTGC           |
| CHA1 E      | GCACAGAATTTGTATAAAGGGG<br>GCTTTTCTTCACTTAGTAAGGATTAA      |

CHA1- TFIIB –ChIP

| <b><u>Name</u></b> | <b><u>Sequence</u></b>                               |
|--------------------|------------------------------------------------------|
| CHA1 A             | GATAGCCTCTTGCGACCTTATT<br>CATTCAATATTTCAAGAAAAATTGTG |
| CHA1 B             | AATTCAAAGGACGGTAAAAGAT<br>AAGGGATGAACATAAATGGGC      |
| CHA1 C             | GGTGGAAACGAATGGATGTC<br>TCTTAGTGTTGTAACCCAAATGC      |
| CHA1 D             | GGAAGAAGCGTTGGATAGCAT<br>CCCCTTTATACAAATTCTGTGC      |

INO1 TFIIB-ChIP

| <b><u>Name</u></b> | <b><u>Sequence</u></b>                                    |
|--------------------|-----------------------------------------------------------|
| INO1 A             | GCTTGTTCTGTTGTCGGGTTC<br>GGAGGTGATTGGAGCAATATTATC         |
| INO1 B             | GATATCCAGAATTTCAAAGAAGAAAAC<br>TATTCTGCGGTGAACCATTAATATAG |
| INO1 C             | GTATTAACCGGTCTCCATTGC<br>CCGACGGGCTTCATATATTTG            |
| INO1 D             | CTCATTTCAACGACTCTCTTTTTTC<br>GCACTTTCTCGCATCTACCTCA       |

CHA1-TBP –ChIP

| <b><u>Name</u></b> | <b><u>Sequence</u></b>                              |
|--------------------|-----------------------------------------------------|
| CHA1 A             | GCGATGAGATAAGATAAAAAGGGA<br>GATTACCGATTCTCTACTTTTGA |
| CHA1 B             | AATTCAAAGGACGGTAAAAGAT<br>AAGGGATGAACATAAATGGGC     |
| CHA1 C             | GGTGGAAACGAATGGATGTC<br>TCTTAGTGTTGTAACCCAAATGC     |
| CHA1 D             | GGAAGAAGCGTTGGATAGCAT<br>CGTTTTGGATATGTTGATGCTTAC   |

INO1 TBP-ChIP

| <b><u>Name</u></b> | <b><u>Sequence</u></b>                                    |
|--------------------|-----------------------------------------------------------|
| INO1 A             | GCTTGTTCTGTTGTCGGGTTC<br>GGAGGTGATTGGAGCAATATTATC         |
| INO1 B             | GATATCCAGAATTTCAAAGAAGAAAAC<br>TATTCTGCGGTGAACCATTAATATAG |
| INO1 C             | GTATTAACCGGTCTCCATTGC<br>CCGACGGGCTTCATATATTTG            |
| INO1 D             | CTCATTTCAACGACTCTCTTTTTTC<br>GCACTTTCTCGCATCTACCTCA       |

CHA1-TFIIE-ChIP

| <u>Name</u> | <u>Sequence</u>          |
|-------------|--------------------------|
| CHA1 A      | GCGATGAGATAAGATAAAAAGGGA |
|             | GATTACCGATTCTCTACTTTTGA  |
| CHA1 B      | AATTCAAAGGACGGTAAAAGAT   |
|             | AAGGGATGAACATAAATGGGC    |
| CHA1 C      | GGTGGAAACGAATGGATGTC     |
|             | TCTTAGTGTTGTAACCCAAATGC  |
| CHA1 D      | GGAAGAAGCGTTGGATAGCAT    |
|             | CCCCTTTATACAAATTCTGTGC   |

INO1 TFIIE-ChIP

| <u>Name</u> | <u>Sequence</u>             |
|-------------|-----------------------------|
| INO1 A      | GAAATATGCGGAGGCCAAG         |
|             | GGAGGTGATTGGAGCAATATTATC    |
| INO1 B      | GATATCCAGAATTTCAAAGAAGAAAAC |
|             | TATTCTGCGGTGAACCATTAATATAG  |
| INO1 C      | GTATTAACCGGTCTCCATTGC       |
|             | CCGACGGGCTTCATATATTTG       |
| INO1 D      | CTCATTTCAACGACTCTCTTTTTTC   |
|             | GCACTTTCTCGCATCTACCTCA      |

CHA1- TFIIH-ChIP

| <u>Name</u> | <u>Sequence</u>          |
|-------------|--------------------------|
| CHA1 A      | GCGATGAGATAAGATAAAAAGGGA |
|             | GATTACCGATTCTCTACTTTTGA  |
| CHA1 B      | AATTCAAAGGACGGTAAAAGAT   |
|             | AAGGGATGAACATAAATGGGC    |
| CHA1 C      | GGTGGAAACGAATGGATGTC     |
|             | TCTTAGTGTTGTAACCCAAATGC  |
| CHA1 D      | GGAAGAAGCGTTGGATAGCAT    |
|             | GGAAAAAATCAATACTAGCAAATA |

INO1 TFIIH-ChIP

| <u>Name</u> | <u>Sequence</u>            |
|-------------|----------------------------|
| INO1 A      | GCTTGTTCTGTTGTCGGGTTTC     |
|             | TCTTCGTAACACTACAGCATTTTCG  |
| INO1 B      | TATTCTGCGGTGAACCATTAATATAG |
|             | GTATTAACCGGTCTCCATTGC      |
| INO1 C      | GTATTAACCGGTCTCCATTGC      |
|             | CCGACGGGCTTCATATATTTG      |
| INO1 D      | GACAAAGAGGCAATAGTTCAAAG    |
|             | CTCATTTCAACGACTCTCTTTTTTC  |

CHA1-TFIIF-ChIP

| <u>Name</u> | <u>Sequence</u>           |
|-------------|---------------------------|
| CHA1 A      | GCGATGAGATAAGATAAAAAGGGA  |
|             | GATTACCGATTCTCTACTTTTGA   |
| CHA1 B      | AATTCAAAGGACGGTAAAAGAT    |
|             | AAGGGATGAACATAAATGGGC     |
| CHA1 C      | GGTGGAAACGAATGGATGTC      |
|             | TCTTAGTGTTGTAACCCAAATGC   |
| CHA1 D      | GGAAGAAGCGTTGGATAGCAT     |
|             | GGAAAAAATCAATACTAGCAAAATA |

INO1-TFIIF-ChIP

| <u>Name</u> | <u>Sequence</u>             |
|-------------|-----------------------------|
| INO1 A      | GAAATATGCGGAGGCCAAG         |
|             | GGAGGTGATTGGAGCAATATTATC    |
| INO1 B      | GATATCCAGAATTTCAAAGAAGAAAAC |
|             | TATTCTGCGGTGAACCATTAATATAG  |
| INO1 C      | GTATTAACCGGTCTCCATTGC       |
|             | CCGACGGGCTTCATATATTTG       |
| INO1 D      | CTCATTTCAACGACTCTCTTTTTC    |
|             | GCACTTTCTCGCATCTACCTCA      |

CHA1-RT-PCR

| <u>Name</u> | <u>Sequence</u>          |
|-------------|--------------------------|
| CHA1 A      | AATTCAAAGGACGGTAAAAGAT   |
| CHA1 B      | AAGGGATGAACATAAATGGGC    |
| 18 S F      | GGAATAATAGAATAGGACGTTTGG |
| 18 S R      | GTTAAGGTCTCGTTCGTTATCG   |

INO1-RT PCR

| <u>Name</u> | <u>Sequence</u>             |
|-------------|-----------------------------|
| INO1 A      | GATATCCAGAATTTCAAAGAAGAAAAC |
| INO1 B      | TATTCTGCGGTGAACCATTAATATAG  |
| 18 S F      | GGAATAATAGAATAGGACGTTTGG    |
| 18 S R      | GTTAAGGTCTCGTTCGTTATCG      |

CHA1-CCC

| <u>Name</u> | <u>Sequence</u>          |
|-------------|--------------------------|
| CHA1P1      | GATTACCGATTCTCTACTTTTGA  |
| CHA1T1      | GTAAGCATCAACATATCCAAAACG |
| CHA1 F      | AATTCAAAGGACGGTAAAAGAT   |
| CHA1 R      | AAGGGATGAACATAAATGGGC    |

INO1-CCC

| <u>Name</u> | <u>Sequence</u>             |
|-------------|-----------------------------|
| INO1 P1     | GAACCCGACAACAGAACAAGC       |
| INO1 T1     | GTTGAGGTAGATGCGAGAAAGTG     |
| INO1 F      | GATATCCAGAATTTCAAAGAAGAAAAC |
| INO1 R      | TATTCTGCGGTGAACCATTAATATAG  |

CHA1-Clp1p-Myc-ChIP

| <b><u>Name</u></b> | <b><u>Sequence</u></b>   |
|--------------------|--------------------------|
| CHA1 A             | GCGATGAGATAAGATAAAAAGGGA |
|                    | GATTACCGATTCTCTACTTTTGA  |
| CHA1 B             | AATTCAAAGGACGGTAAAAGAT   |
|                    | AAGGGATGAACATAAATGGGC    |
| CHA1 C             | GGTGGAAACGAATGGATGTC     |
|                    | TCTTAGTGTTGTAACCCAAATGC  |
| CHA1 D             | GGAAGAAGCGTTGGATAGCAT    |
|                    | CCCCTTTATACAAATTCTGTGC   |

INO1-Clp1p-Myc-ChIP

| <b><u>Name</u></b> | <b><u>Sequence</u></b>        |
|--------------------|-------------------------------|
| INO1 A             | GAATATTGAACCTTATTTAATTCACATGG |
|                    | GGAGGTGATTGGAGCAATATTATC      |
| INO1 B             | GTATTAACCGGTCTCCATTGC         |
|                    | CCGACGGGCTTCATATATTTG         |
| INO1 C             | GATATCCAGAATTTCAAAGAAGAAAAC   |
|                    | TATTCTGCGGTGAACCATTAATATAG    |
| INO1 D             | CTCATTTCAACGACTCTCTTTTTTC     |
|                    | ATGTAAAGTATATGTATTGATGGAAGG   |

CHA1-Rna14-TAP-ChIP

| <b><u>Name</u></b> | <b><u>Sequence</u></b>   |
|--------------------|--------------------------|
| CHA1 A             | GCCCCAGCGGAAATGTAA       |
|                    | CATTCATATTTCAAGAAAATTGTG |
| CHA1 B             | AATTCAAAGGACGGTAAAAGAT   |
|                    | AAGGGATGAACATAAATGGGC    |
| CHA1 C             | GTTGGTGGAGGTGGTTTATACA   |
|                    | TCTTAGTGTTGTAACCCAAATGC  |
| CHA1 D             | GGAAGAAGCGTTGGATAGCAT    |
|                    | CGTTTTGGATATGTTGATGCTTAC |

INO1-Rna14-TAP-ChIP

| <b><u>Name</u></b> | <b><u>Sequence</u></b>      |
|--------------------|-----------------------------|
| INO1 A             | GCTTGTTCTGTTGTCTGGGTTTC     |
|                    | GGAGGTGATTGGAGCAATATTATC    |
| INO1 B             | GATATCCAGAATTTCAAAGAAGAAAAC |
|                    | TATTCTGCGGTGAACCATTAATATAG  |
| INO1 C             | GTATTAACCGGTCTCCATTGC       |
|                    | CCGACGGGCTTCATATATTTG       |
| INO1 D             | CTCATTTCAACGACTCTCTTTTTTC   |
|                    | GCACTTTCTCGCATCTACCTCA      |

CHA1-Rna15-TAP-ChIP

| <u>Name</u> | <u>Sequence</u>           |
|-------------|---------------------------|
| CHA1 A      | GCGATGAGATAAGATAAAAAGGGA  |
|             | GATTACCGATTCCCTCTACTTTTGA |
| CHA1 B      | AATTCAAAGGACGGTAAAAGAT    |
|             | AAGGGATGAACATAAATGGGC     |
| CHA1 C      | GGTGGAAACGAATGGATGTC      |
|             | TCTTAGTGTTGTAACCCAAATGC   |
| CHA1 D      | GGAAGAAGCGTTGGATAGCAT     |
|             | CCCCTTATACAAATTCTGTGC     |

INO1-Rna15-TAP-ChIP

| <u>Name</u> | <u>Sequence</u>             |
|-------------|-----------------------------|
| INO1 A      | GAAATATGCGGAGGCCAAG         |
|             | GGAGGTGATTGGAGCAATATTATC    |
| INO1 B      | GATATCCAGAATTTCAAAGAAGAAAAC |
|             | TATTCTGCGGTGAACCATTAATATAG  |
| INO1 C      | GTATTAACCGGTCTCCATTGC       |
|             | CCGACGGGCTTCATATATTTG       |
| INO1 D      | CTCATTTCAACGACTCTCTTTTTC    |
|             | GCACTTTCTCGCATCTACCTCA      |

CHA1-Pcf11-TAP-ChIP

| <u>Name</u> | <u>Sequence</u>           |
|-------------|---------------------------|
| CHA1 A      | GCGATGAGATAAGATAAAAAGGGA  |
|             | GATTACCGATTCCCTCTACTTTTGA |
| CHA1 B      | AATTCAAAGGACGGTAAAAGAT    |
|             | AAGGGATGAACATAAATGGGC     |
| CHA1 C      | GGTGGAAACGAATGGATGTC      |
|             | TCTTAGTGTTGTAACCCAAATGC   |
| CHA1 D      | GGAAGAAGCGTTGGATAGCAT     |
|             | CGTTTTGGATATGTTGATGCTTAC  |

INO1-Pcf11-TAP-ChIP

| <u>Name</u> | <u>Sequence</u>           |
|-------------|---------------------------|
| CHA1 A      | GCGATGAGATAAGATAAAAAGGGA  |
|             | GATTACCGATTCCCTCTACTTTTGA |
| CHA1 B      | AATTCAAAGGACGGTAAAAGAT    |
|             | AAGGGATGAACATAAATGGGC     |
| CHA1 C      | GGTGGAAACGAATGGATGTC      |
|             | TCTTAGTGTTGTAACCCAAATGC   |
| CHA1 D      | GGAAGAAGCGTTGGATAGCAT     |
|             | CGTTTTGGATATGTTGATGCTTAC  |

CHA1-Strand-Specific RT-PCR primers

| <u>Name</u>     | <u>Sequence</u>           |
|-----------------|---------------------------|
| A <sub>as</sub> | CGAGTACTAATCACCGCGAAC     |
| B <sub>as</sub> | AATTCAAAGGACGGTAAAAGAT    |
| C <sub>as</sub> | GGAAGAAGCGTTGGATAGCAT     |
| A <sub>s</sub>  | AAGAGAAAACGTATAAACATTTTCC |
| B <sub>s</sub>  | TCTCTTGTCTATCCAGCACTTAAAA |
| C <sub>s</sub>  | AAGGGATGAACATAAATGGGC     |
| D <sub>s</sub>  | TGCTATCCAACGCTTCTTCC      |

Strain -making primers

| <u>Name</u>         | <u>Sequence</u>                                                              |
|---------------------|------------------------------------------------------------------------------|
| 5' TFIIB-Myc-F2     | TTGCTAATGGTGTAGTGTCTTTGGATAACTTACCGGGCGTTGAAAAGAA<br>ACGGATCCCCGGGTTAATTAA   |
| 3'TFIIB-Myc-R1      | CACGAGTACCCGTGCTTCTTGTTCCCTATAATTTACTGTTTTATCACTTCA<br>GAATTCGAGCTCGTTTAAAC  |
| 5'F1-RNA14-Myc-tag  | TTTTAAATGATCAAGTAGAGATTCCAACAGTTGAGAGCACCAAGTCAGG<br>TCGGATCCCCGGGTTAATTAA   |
| 3'R1-RNA14- Myc-tag | AGATGTGTTGGTATAAATATTCATATATACCTATTTATTAACGTAATGTTA<br>GAATTCGAGCTCGTTTAAAC  |
| 5'F1- PCF11-Myc-tag | CTAATAGTGGCAAGGTCGGTTTGGATGACTTAAAGAAATTGGTCACAAA<br>ACGGATCCCCGGGTTAATTAA   |
| 3'R1- PCF11-Myc-tag | TAATATAATATATAGTTATTAATTTAAATGTATATATGCAGTTCTGCTC<br>GAATTCGAGCTCGTTTAAAC    |
| 5' F2-RNA15-HA-tag  | CTATTTGGGACTTAAAACAAAAAGCATTAAAGGGGAGAATTTGGTGCATT<br>TCGGATCCCCGGGTTAATTAA  |
| 3'RNA15-HA-tag      | ATCATTGCGGAACCGCATTTTTTTTTTTTGTATTTTTGCCTCCCTAGTTTCA<br>GAATTCGAGCTCGTTTAAAC |
| 5'TFA2-TAP-C        | TTACTAACACTCATATGACCGGTATCTTGAAAGATTATTCCCATAGAGTA<br>TCCATGGAAAAGAGAAG      |
| 3'TFA2-TAP-C        | CAGTCTCTTTAACCTAATATGCAAACGAAAATGATTTAATCAAACAACC<br>TACGACTCACTATAGGG       |
| 5'TFG2-TAP-C        | GAGACGCGGAGGCTGACTTGGAAGATGAAATAGAAATGGAAGATGTCC<br>TTCCATGGAAAAGAGAAG       |
| 3'TFG2-TAP-C        | CTCAAGAACTGCGTAAATATAAAATTAATGAAGAAAATCTGATTGTCAA<br>TACGACTCACTATAGGG       |
| 5' CCL1-C-TAP       | AGTTGAATGGAGAAGATACTTCGTCCACCGTTGAGAAAAAGCAAAAAAC<br>ATCCATGGAAAAGAGAAG      |
| 3' CCL1-C-TAP       | CTTAATCTATATATATATAAAAACAGAAACCTACGGTAACAGAGCTGTT<br>TACGACTCACTATAGGG       |
| 5'TRP1-KMX          | TATTGAGCACGTGAGTATACGTGATTAAGCACACAAAGGCAGCTTGA<br>GTCAGCTGAAGCTTCGTACGC     |
| 3'TRP1-KMX          | TGCAGGCAAGTGCACAAACAATACTTAAATAAATACTACTCAGTAATAAC<br>GCATAGGCCACTAGTGGATCTG |
